# Supplementary material for: Treatment Motivations and Expectations in Patients with Actinic Keratosis: A German-Wide Multicenter, Cross-Sectional Trial
Source: MDPI journal article supplement (doi:10.3390/jcm9051438), 2020-05-12
Supplement: s1 [file s1]

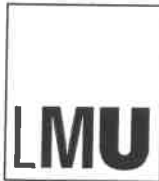

LUDWIG-  
MAXIMILIANS-  
UNIVERSITÄT  
MÜNCHEN

ETHIKKOMMISSION BEI DER LMU MÜNCHEN

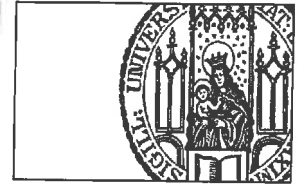

Ethikkommission · Pettenkoferstr. 8 · 80336 München  
Klinikum der Universität München  
Klinik und Poliklinik für Dermatologie und Allergologie  
Prof. Dr. Carola Berking  
Frauenlobstr. 9 - 11  
80337 München

Vorsitzender:  
Prof. Dr. W. Eisenmenger  
Telefon+49 (0)89 440055191  
Telefax+49 (0)89 440055192  
Ethikkommission@  
med.uni-muenchen.de  
[www.ethikkommission.med.uni-muenchen.de](http://www.ethikkommission.med.uni-muenchen.de)

Anschrift:  
Pettenkoferstr. 8a  
D-80336 München

Ansprechpartner:  
Oskars Mikazans, M.A.

Telefon: 089-4400 57604  
E-Mail: [oskars.mikazans@med.uni-muenchen.de](mailto:oskars.mikazans@med.uni-muenchen.de)

07.06.2019 Hb /om

Projekt Nr.: **19-356 KB** (bitte bei Schriftwechsel angeben)

### Keine Beratungspflicht

Projekt: Treatment motivation and expectation among patients with actinic keratosis: a cross-sectional survey  
Antragsteller: Prof. Dr. Carola Berking, Klinikum der Universität München, Klinik und Poliklinik für Dermatologie und Allergologie, Frauenlobstr. 9 - 11, 80337 München  
Untersucher: Prof. Dr. Carola Berking, Klinikum der Universität München, Klinik und Poliklinik für Dermatologie und Allergologie, Frauenlobstr. 9 - 11, 80337 München

Sehr geehrte Frau Prof. Berking,

besten Dank für Ihr Schreiben vom 04.05.2019, mit dem Sie um eine Stellungnahme zum o.g. Projekt bitten.

Da Sie Ihre Untersuchungen anhand von Datensätzen durchführen, die irreversibel anonymisiert sind, d. h. dass auch den Bearbeitern kein Rückschluss auf die personenbezogenen Daten der Probanden möglich ist, besteht keine Beratungspflicht durch die Ethikkommission.

Für Ihre Untersuchungen wünsche ich Ihnen viel Erfolg.

Mit freundlichen Grüßen

Prof. Dr. W. Eisenmenger  
Vorsitzender der Ethikkommission

#### Mitglieder der Kommission:

Prof. Dr. W. Eisenmenger (Vorsitzender), Prof. Dr. E. Held (Vorsitzender), Prof. Dr. H. Angstwurm, Prof. Dr. S. Böck, J. Eckert, Prof. Dr. B. Emmerich, Prof. Dr. S. Endres, Prof. Dr. R. Fischer, Prof. Dr. H. U. Gallwas, Prof. Dr. O. Genzel-Boroviczény, Prof. Dr. K. Hahn, Prof. Dr. N. Harbeck, Dr. B. Henrikus, Prof. Dr. C. Heumann, Prof. Dr. A. Holsteg, Prof. Dr. R. M. Huber, Prof. Dr. V. Klauss, Dr. F. Kohlmayer, Prof. Dr. J. Lindner, Prof. Dr. S. Lorenzl, Prof. Dr. G. Marckmann, Dr. V. Mönch, PD Dr. Dr. H. Mückter, Prof. Dr. A. Nassehi, Prof. Dr. R. Penning, Prof. Dr. J. Peters, Prof. Dr. K. Pfeifer, Dr. I. Saake, Prof. Dr. H. Schardey, Prof. Dr. M. Schmauss, Prof. Dr. U. Schroth, Prof. Dr. O. Steinlein, PD Dr. G. Stüben, Prof. Dr. H. Waldner, PD Dr. U. Wandl, Prof. Dr. C. Wendtner, Dr. A. Yassouridis, Dr. C. Zach
